# Supplementary material
Source: MDPI journal article supplement (https://www.mdpi.com/2075-163X/13/9/1117)
Supplement: s1 [file s1]

# Supplementary Material

## Fluid Inclusion Studies of Barite Disseminated in Hydrothermal Sediments of the Mohns Ridge

Marina D. Kravchishina <sup>1,\*</sup>, Vsevolod Yu. Prokofiev <sup>1,2</sup>, Olga M. Dara <sup>1</sup>, Boris V. Baranov <sup>1</sup>, Alexey A. Klyuvitkin <sup>1</sup>, Karina S. Iakimova <sup>1,3</sup>, Vladislav Yu. Kalgin <sup>1</sup> and Alla Yu. Lein <sup>1</sup>

<sup>1</sup> Shirshov Institute of Oceanology, Russian Academy of Sciences, 36 Nakhimovsky Prosp., Moscow 117997, Russia; vpr2004@rambler.ru (V.Y.P.); olgadara@mail.ru (O.M.D.); bbaranov@ocean.ru (B.V.B.); klyuvitkin@ocean.ru (A.A.K.); yakikarina@gmail.com (K.S.I.); kalgin.vladislav@yandex.ru (V.Y.K.); allaulein@gmail.com (A.Y.L.)

<sup>2</sup> Institute of Geology of Ore Deposits, Petrography, Mineralogy, and Geochemistry, Russian Academy of Sciences, 35 Staromonetny Per., Moscow 119017, Russia

<sup>3</sup> Geological Faculty, Lomonosov Moscow State University, GSP-1, Leninskie Gory, Moscow 119991, Russia

\* Correspondence: kravchishina@ocean.ru; Tel.: +7-499-1247737

**Table S1.** EDS data of volcanic glasses collected from hydrothermally altered sediments of the Jan Mayen vent field area.

| Sample                         | 5516                | 6130-I | 6130-II | 6131-I | 6131-II | 6131-III | 6138-I | 6146-II |
|--------------------------------|---------------------|--------|---------|--------|---------|----------|--------|---------|
| Number of glasses              | 24                  | 23     | 6       | 14     | 12      | 52       | 3      | 11      |
|                                | Mean content, wt. % |        |         |        |         |          |        |         |
| Na <sub>2</sub> O              | 0.95                | 2.94   | 2.88    | 2.80   | 2.90    | 2.87     | 3.03   | 2.44    |
| MgO                            | 1.13                | 5.19   | 5.21    | 6.11   | 6.24    | 5.63     | 4.19   | 7.46    |
| Al <sub>2</sub> O <sub>3</sub> | 1.75                | 13.94  | 13.88   | 14.10  | 15.27   | 13.78    | 13.08  | 15.11   |
| SiO <sub>2</sub>               | 39.32               | 54.87  | 54.76   | 54.46  | 54.94   | 54.70    | 55.35  | 53.28   |
| P <sub>2</sub> O <sub>5</sub>  | 1.58                | 0.37   | 0.36    | 0.15   | 0.20    | 0.28     | 0.43   | 0.26    |
| K <sub>2</sub> O               | 0.15                | 1.08   | 1.07    | 0.68   | 0.63    | 0.83     | 1.14   | 0.86    |
| CaO                            | 4.46                | 9.25   | 9.56    | 10.25  | 11.61   | 9.74     | 8.46   | 12.44   |
| TiO <sub>2</sub>               | 0.08                | 1.97   | 1.95    | 1.64   | 1.46    | 1.90     | 2.42   | 1.39    |
| MnO                            | 0.00                | 0.18   | 0.21    | 0.16   | 0.11    | 0.19     | 0.20   | 0.10    |
| FeO                            | 50.58               | 10.20  | 10.28   | 9.54   | 6.59    | 9.95     | 11.73  | 7.13    |
| <b>Total</b>                   | 100.00              | 100.00 | 100.16  | 99.89  | 99.95   | 99.87    | 100.03 | 100.49  |

**Table S2.** XRF major element composition and Ba (wt.%) of the surface sediment samples and hyaloclastites.

| Sample | Lyer,<br>cm | N        | W         | LOI   | Na <sub>2</sub> O | MgO   | Al <sub>2</sub> O <sub>3</sub> | SiO <sub>2</sub> | K <sub>2</sub> O | CaO   | TiO <sub>2</sub> | MnO  | Fe <sub>2</sub> O <sub>3tot</sub> | P <sub>2</sub> O <sub>5</sub> | S <sub>tot</sub> | Total | Ba   | Rock type     |
|--------|-------------|----------|-----------|-------|-------------------|-------|--------------------------------|------------------|------------------|-------|------------------|------|-----------------------------------|-------------------------------|------------------|-------|------|---------------|
| 5535   | 0-5         | 73°33.0' | 08°09.0'  | 0.03  | 2.32              | 8.63  | 14.40                          | 51.34            | 0.14             | 11.04 | 1.36             | 0.17 | 10.19                             | 0.10                          | 0.11             | 99.83 | 0.01 | hyaloclastite |
| 6446   | 0-3         |          |           | 0.33  | 2.21              | 8.72  | 16.13                          | 49.60            | 0.68             | 12.73 | 1.33             | 0.13 | 7.54                              | 0.22                          | 0.11             | 99.73 | 0.03 | -/-           |
| 6131   | 0-10        | 71°17.9' | 05°46.4'  | 0.74  | 2.96              | 4.66  | 15.52                          | 52.81            | 0.69             | 10.68 | 1.89             | 0.15 | 9.27                              | 0.20                          | 0.18             | 99.75 | 0.07 | -/-           |
| 6138   | 0-3         | 71°15.7' | 05°48.9'  | 0.12  | 2.86              | 4.53  | 14.90                          | 51.30            | 0.96             | 9.93  | 2.15             | 0.23 | 12.32                             | 0.29                          | 0.17             | 99.76 | 0.05 | -/-           |
| 6130   | 0-3         | 71°16.2' | 05°48.1'  | 9.69  | 2.35              | 4.47  | 12.01                          | 46.65            | 0.93             | 9.30  | 2.00             | 0.19 | 11.76                             | 0.26                          | 0.19             | 99.80 | 0.04 | -/-           |
| 6130   | 0-2         | -/-      | -/-       | 0.60  | 2.71              | 5.40  | 14.16                          | 51.52            | 0.96             | 9.86  | 2.08             | 0.19 | 11.85                             | 0.27                          | 0.18             | 99.78 | 0.04 | -/-           |
| 6131   | 1-8         | 71°17.9' | 05°46.4'  | 6.75  | 1.98              | 5.01  | 16.21                          | 47.73            | 0.79             | 5.63  | 1.84             | 0.11 | 12.24                             | 0.27                          | 1.20             | 98.76 | 0.65 | sediment      |
| 6131   | 0-7         | -/-      | -/-       | 16.32 | 1.01              | 3.89  | 21.46                          | 41.74            | 0.57             | 1.02  | 2.19             | 0.03 | 7.67                              | 0.13                          | 3.76             | 98.79 | 0.11 | -/-           |
| 6131   | 1-7         | -/-      | -/-       | 19.54 | 0.33              | 1.27  | 22.23                          | 32.60            | 0.58             | 1.22  | 2.18             | 0.07 | 11.98                             | 0.27                          | 5.75             | 98.02 | 0.13 | -/-           |
| 6130   | 0-2         | 71°16.2' | 05°48.1'  | 10.37 | 1.32              | 3.57  | 12.08                          | 46.42            | 1.49             | 14.27 | 1.60             | 0.21 | 7.76                              | 0.39                          | 0.30             | 99.53 | 0.07 | -/-           |
| 6132   | 0-2         | 71°18.0' | 05°42.0'  | 5.26  | 1.52              | 3.64  | 12.46                          | 48.96            | 1.32             | 11.95 | 2.21             | 0.29 | 11.15                             | 0.50                          | 0.54             | 98.80 | 0.30 | -/-           |
| 6133   | 0-2         | 71°17.8' | 05°41.9'  | 11.35 | 2.36              | 2.75  | 8.86                           | 39.37            | 1.12             | 10.04 | 1.26             | 0.49 | 20.97                             | 0.77                          | 0.45             | 98.79 | 0.30 | -/-           |
| 6133   | 0-3         | -/-      | -/-       | 10.96 | 2.40              | 2.68  | 8.67                           | 37.43            | 1.03             | 12.79 | 1.50             | 0.60 | 20.46                             | 0.83                          | 0.43             | 98.78 | 0.28 | -/-           |
| 6146   | 0-2         | 71°18.5' | 05°40.3'  | 4.54  | 1.45              | 4.30  | 12.08                          | 48.68            | 1.35             | 16.17 | 1.63             | 0.23 | 8.56                              | 0.43                          | 0.37             | 98.79 | 0.13 | -/-           |
| 6146   | 2-6         | -/-      | -/-       | 0.10  | 1.51              | 7.88  | 15.70                          | 48.67            | 0.88             | 13.40 | 1.59             | 0.15 | 8.81                              | 0.26                          | 0.31             | 99.26 | 0.04 | -/-           |
| 6137   | 0-1         | 71°17.8' | 05°46.9'  | 6.44  | 2.12              | 6.18  | 16.15                          | 48.82            | 1.13             | 5.24  | 1.81             | 0.31 | 10.47                             | 0.29                          | 0.83             | 98.79 | 0.88 | -/-           |
| 6137   | 1-3         | -/-      | -/-       | 6.59  | 1.89              | 5.32  | 15.36                          | 49.06            | 1.13             | 5.18  | 1.71             | 0.25 | 12.21                             | 0.36                          | 0.72             | 98.78 | 0.76 | -/-           |
| 6137   | 3-4         | -/-      | -/-       | 3.56  | 2.39              | 5.16  | 15.06                          | 50.02            | 1.07             | 6.14  | 1.81             | 0.17 | 13.27                             | 0.34                          | 0.78             | 98.77 | 0.83 | -/-           |
| 6137   | 4-10        | -/-      | -/-       | 6.64  | 1.88              | 4.72  | 15.26                          | 49.14            | 1.12             | 5.24  | 1.74             | 0.12 | 12.79                             | 0.33                          | 0.81             | 98.79 | 0.86 | -/-           |
| 6131   | 0-1         | 71°17.9' | 05°46.4'  | 6.61  | 1.94              | 4.56  | 18.44                          | 47.03            | 0.84             | 5.11  | 1.96             | 0.11 | 11.62                             | 0.20                          | 1.36             | 98.78 | 0.56 | -/-           |
| 6131   | 1-2         | -/-      | -/-       | 5.40  | 1.42              | 4.74  | 18.50                          | 47.40            | 0.85             | 5.83  | 1.96             | 0.12 | 12.12                             | 0.23                          | 1.24             | 98.81 | 0.57 | -/-           |
| 6131   | 2-3         | -/-      | -/-       | 5.32  | 1.92              | 5.05  | 17.78                          | 47.81            | 0.79             | 6.17  | 1.87             | 0.12 | 11.48                             | 0.22                          | 1.25             | 98.78 | 0.53 | -/-           |
| 6131   | 3-4         | -/-      | -/-       | 5.56  | 1.80              | 5.26  | 17.09                          | 48.02            | 0.83             | 6.33  | 1.93             | 0.11 | 11.34                             | 0.22                          | 1.28             | 98.77 | 0.44 | -/-           |
| 6131   | 4-5         | -/-      | -/-       | 6.53  | 1.97              | 5.45  | 16.88                          | 48.07            | 0.85             | 5.33  | 1.93             | 0.10 | 11.17                             | 0.20                          | 1.31             | 98.79 | 0.40 | -/-           |
| 6131   | 5-6         | -/-      | -/-       | 6.56  | 1.96              | 4.71  | 16.36                          | 47.18            | 0.86             | 6.67  | 1.87             | 0.12 | 11.51                             | 0.20                          | 1.78             | 98.78 | 0.65 | -/-           |
| 6131   | 6-7         | -/-      | -/-       | 5.65  | 1.87              | 5.34  | 17.69                          | 47.85            | 0.80             | 5.99  | 1.85             | 0.11 | 10.86                             | 0.20                          | 1.58             | 98.79 | 0.58 | -/-           |
| 6131   | 0-10        | -/-      | -/-       | 5.46  | 1.40              | 5.82  | 16.71                          | 48.44            | 0.84             | 5.39  | 1.94             | 0.11 | 11.70                             | 0.24                          | 1.73             | 98.78 | 0.72 | -/-           |
| 5516   | 0-3         | 71°17.9' | 05°46.2'  | 2.10  | 2.45              | 6.08  | 15.72                          | 51.08            | 0.82             | 8.88  | 1.83             | 0.13 | 9.47                              | 0.15                          | 0.30             | 99.01 | 0.08 | -/-           |
| 5516   | 0-3         | -/-      | -/-       | 6.80  | 1.38              | 5.21  | 15.30                          | 42.06            | 0.44             | 0.81  | 2.33             | 0.01 | 9.28                              | 0.18                          | 9.80             | 93.60 | 5.85 | -/-           |
| 5516   | 0-3         | -/-      | -/-       | 7.60  | 1.95              | 5.31  | 15.11                          | 52.09            | 1.56             | 3.24  | 1.65             | 0.04 | 5.54                              | 0.19                          | 2.40             | 96.68 | 2.41 | -/-           |
| 6147   | 0-10        | 73°34.0' | 08°09.8'E | 10.97 | 2.51              | 23.19 | 1.59                           | 45.04            | 0.16             | 0.43  | 0.05             | 0.12 | 12.51                             | 0.09                          | 2.63             | 98.29 | 1.65 | sediment      |
